# Supplementary material for: Prevalence, Predictors, and Mid-Term Outcomes of Non-Home Discharge After Transcatheter Aortic Valve Implantation
Source: PubMed Central journal article supplement — Circ Rep. 2020 Oct 1;2(10):617–24. doi: 10.1253/circrep.CR-20-0085 (PMC7933692; doi:10.1253/circrep.cr-20-0085), 2020-10-01
Supplement: circrep-2-617-s001.pdf [file circrep-2-617-s001.pdf]

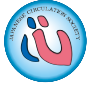

---

## **Prevalence, Predictors, and Mid-Term Outcomes of Non-Home Discharge After Transcatheter Aortic Valve Implantation**

---

Yuuki Muto, MD; Ryosuke Higuchi, MD; Akiomi Yoshihisa, MD, PhD;  
Kenichi Hagiya, MD; Mike Saji, MD; Itaru Takamisawa, MD;  
Tetsuya Tobaru, MD, PhD; Nobuo Iguchi, MD, PhD; Shuichiro Takanashi, MD, PhD;  
Morimasa Takayama, MD, PhD; Yasuchika Takeishi, MD, PhD; Mitsuaki Isobe, MD, PhD

**Supplementary Table. The Definitions of Patient Comorbidities**

| <b>Comorbidity</b>        | <b>Definition</b>                                                                                                        |
|---------------------------|--------------------------------------------------------------------------------------------------------------------------|
| Hypertension              | The recent use of antihypertensive drug                                                                                  |
| Diabetes mellitus         | The recent use of insulin or antidiabetic drug                                                                           |
| Peripheral artery disease | ABI less than 0.9 or previous revascularization of lower limb                                                            |
| Previous stroke           | Previous symptomatic cerebrovascular event including TIA, cerebral infarction and cerebral hemorrhage                    |
| AF/AFL                    | The documentation on ECG or medical history on patient record                                                            |
| COPD                      | FEV <sub>1</sub> % less than 70% or the recent use of drug for COPD                                                      |
| OMI                       | At least one or more finding compatible with myocardial infarction on ECG, echocardiography, radioisotope imaging or MRI |
| Previous CABG             | Previous isolated or concurrent CABG                                                                                     |

ABI, ankle-brachial index; TIA, transient ischemic attack; AF, atrial fibrillation; AFL, atrial flutter; ECG, electrocardiogram; COPD, chronic obstructive pulmonary disease; FEV, forced expiratory volume; OMI, old myocardial infarction; MRI, magnetic resonance imaging; CABG, coronary artery bypass grafting.
